# Supplementary material for: Synergistic and Competitive Effects between Zinc Dialkyldithiophosphates and Modern Generation of Additives in Engine Oil
Source: MDPI journal article supplement (doi:10.3390/lubricants9040035), 2021-03-31
Supplement: s1 [file s1]

## Supporting Information

Synergistic and Competitive Effects Between ZDDP and Modern Generation of Additives in Engine Oil.

Khai K. Huynh <sup>(ID)</sup>, Anh Kiet Tieu\*, Sang T. Pham

<sup>(ID)</sup> School of Mechanical, Materials, Mechatronics and Biomedical Engineering, University of Wollongong, Wollongong, NSW 2500, Australia; [kkh981@uow.edu.au](mailto:kkh981@uow.edu.au)

\*Correspondence: [ktieu@uow.edu.au](mailto:ktieu@uow.edu.au)

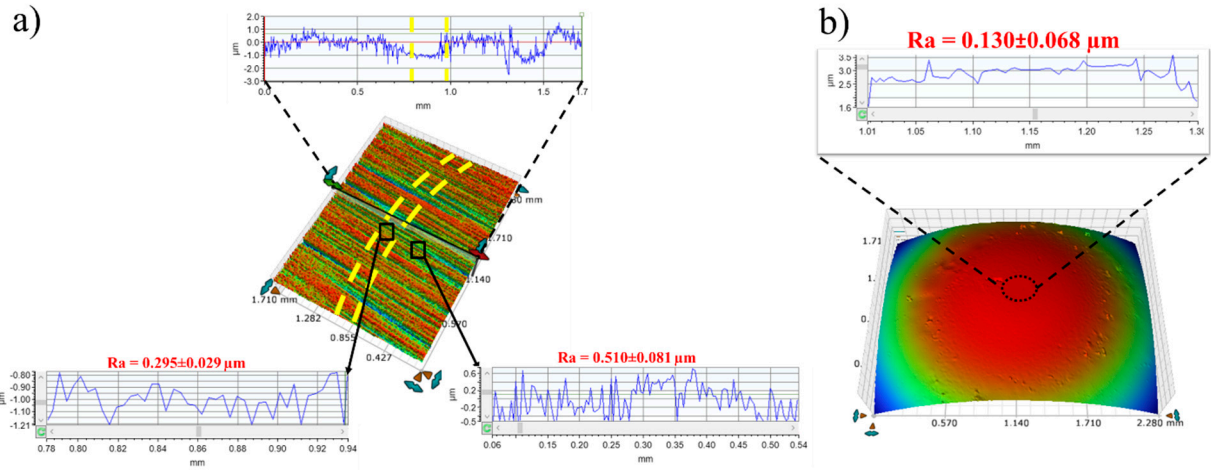

Figure S1: 3D image and scanning profile of the disc (a) and ball (b) wear track of ZDDP tribotest.

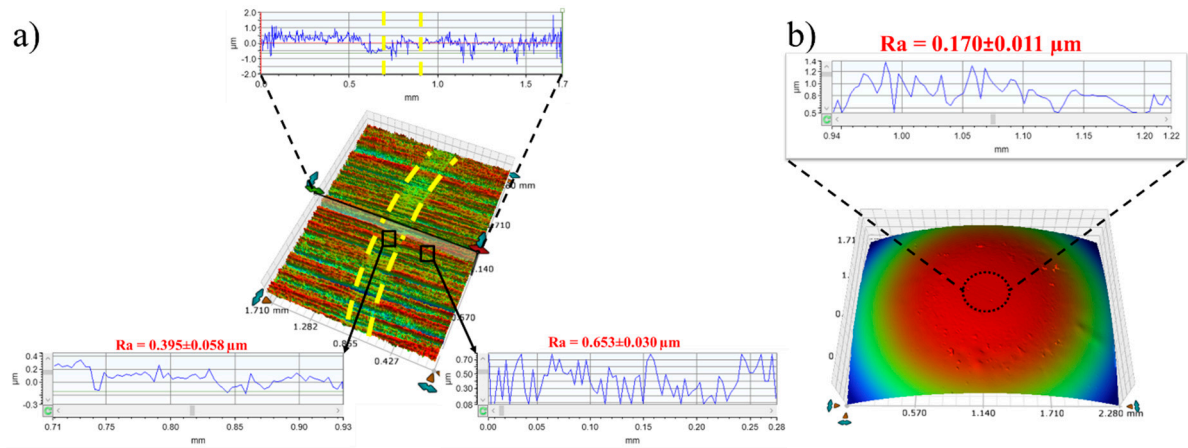

Figure S2: 3D image and scanning profile of the disc (a) and ball (b) wear track of pure CPCa tribotest.

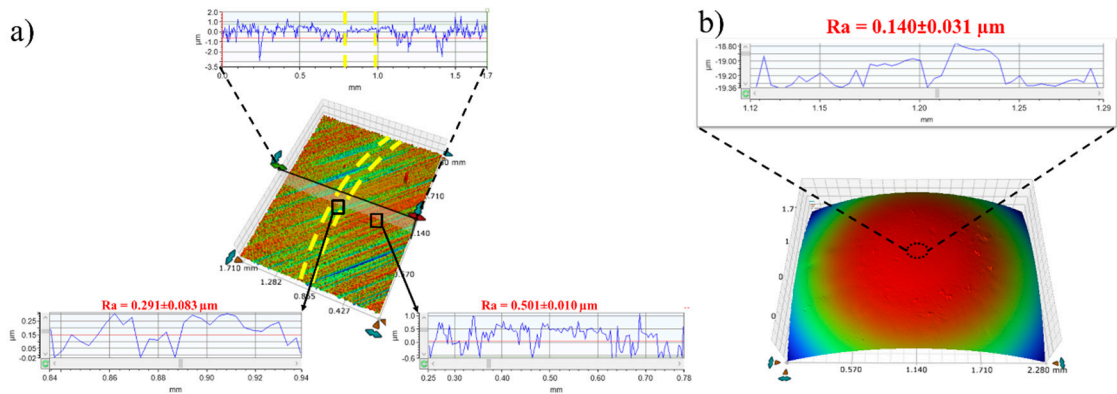

Figure S3: 3D image and scanning profile of the disc (a) and ball (b) wear track of Ni tribotest.

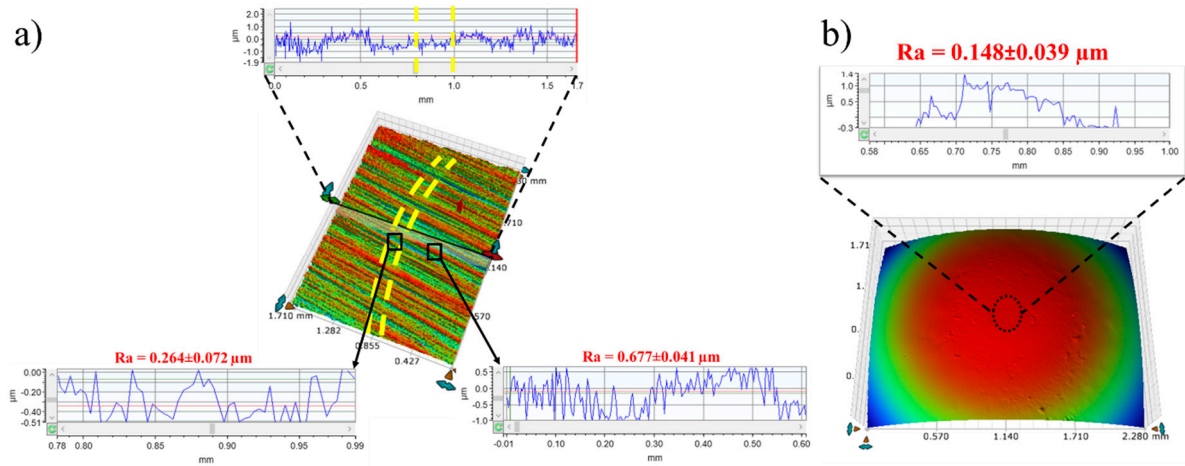

Figure S4: 3D image and scanning profile of the disc (a) and ball (b) wear track of ZDDP+Ni tribotest.

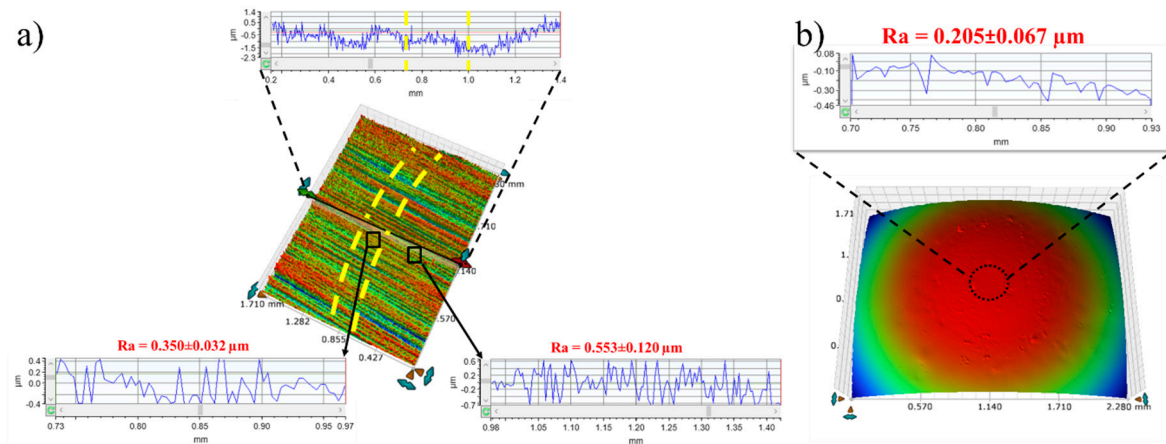

Figure S5: 3D image and scanning profile of the disc (a) and ball (b) wear track of ZDDP+CPCa tribotest.
